# Supplementary material
Source: PubMed Central journal article supplement (PMC7846267)
Supplement: NIHMS1636717-supplement-1.pdf [file NIHMS1636717-supplement-1.pdf]

**Supplemental information**

**Upregulation of antioxidant capacity and nucleotide precursor availability  
suffices for oncogenic transformation**

**Yang Zhang, Yi Xu, Wenyun Lu, Jonathan M. Ghergurovich, Lili Guo, Ian A. Blair,  
Joshua D. Rabinowitz, and Xiaolu Yang**

**Figure S1**

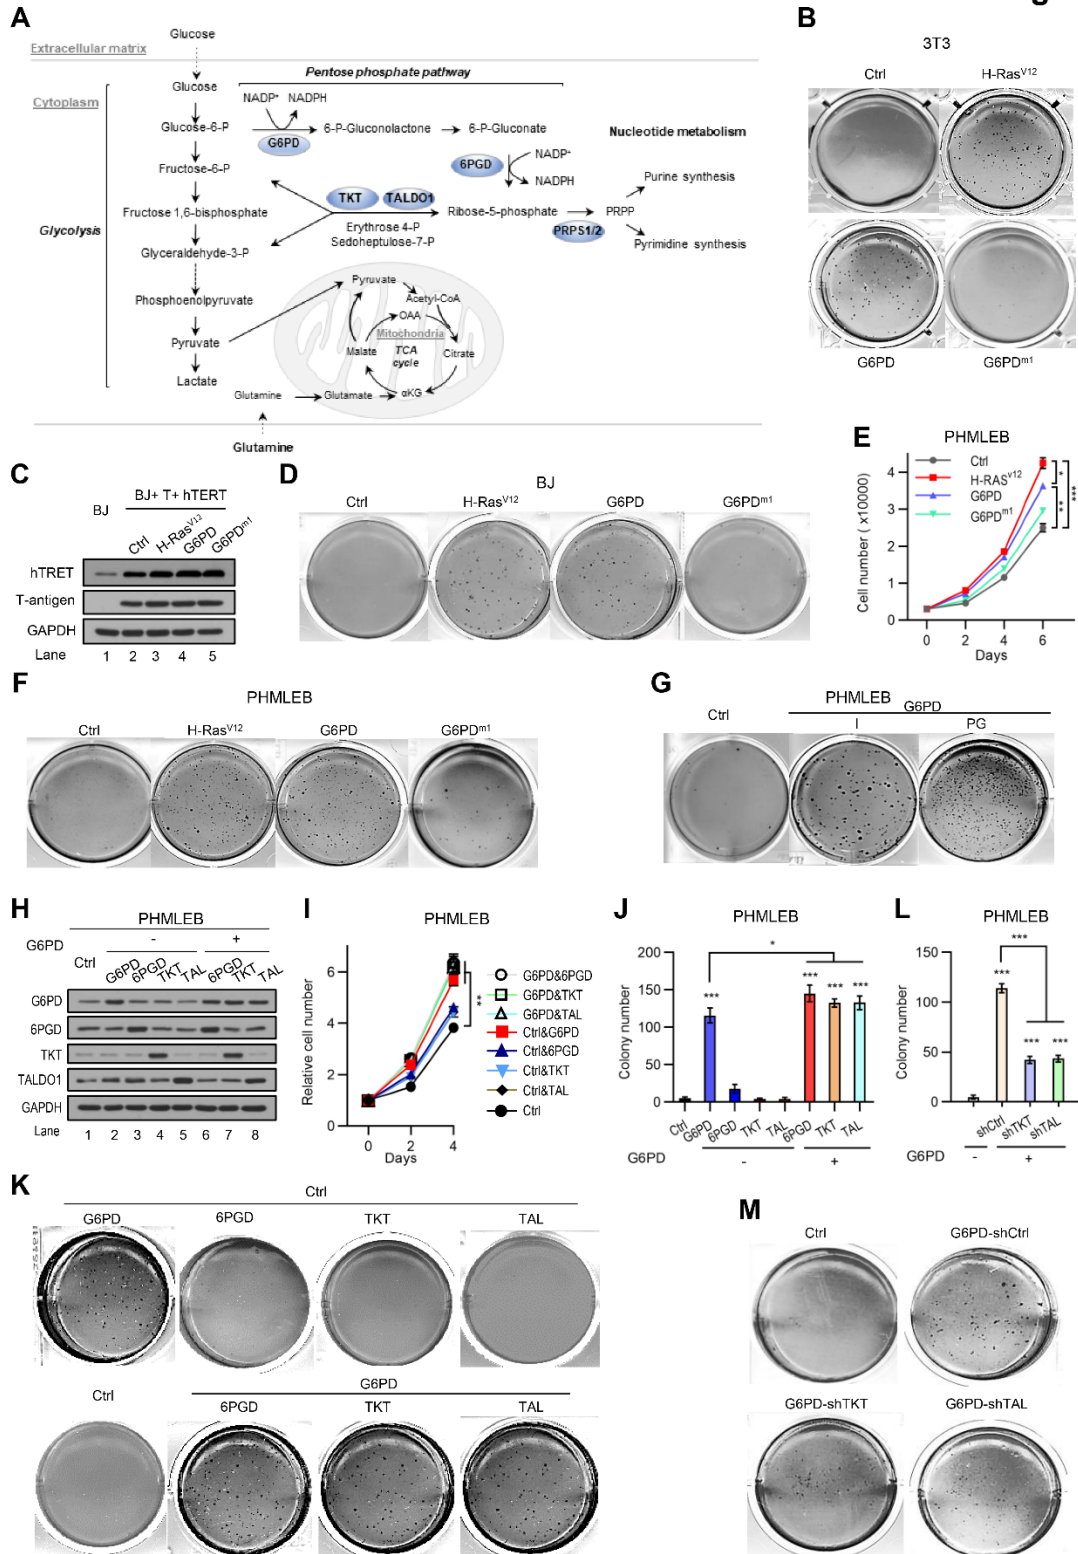

**Figure S1. G6PD, but not other PPP enzymes, enables anchorage-independent growth of immortalized murine and human cells, related to Figure 1 and 3**

(A) Schematic diagram of central glucose metabolic pathways and nucleotide synthesis.

(B) Representative images of soft agar colonies formed by NIH3T3 cells infected with retroviruses control (Ctrl) or retroviruses expressing H-Ras<sup>V12</sup>, G6PD, or G6PD<sup>m1</sup>. Related to Figures 1C and 1D.

(C) Protein expression in primary BJ cells, as well as BJ cells immortalized with hTERT and SV40 T-antigens (BJ+T+hTERT) infected with control, H-Ras<sup>V12</sup>, G6PD, or G6PD<sup>m1</sup> retroviruses.

(D and F) Representative image of soft agar colonies for BJ (D) or PHMLEB (F) cells. Related to Figures 1F and 1H.

(E) Adherent proliferation for PHMLEB cells stably transduced with control, H-Ras<sup>V12</sup>, G6PD, or G6PD<sup>m1</sup> retroviral vectors.

(G) Representative images of soft agar colonies formed by PHMLEB cells, as well as PHMLEB/G6PD cells previously un-grown (initial or I) or grown (PG) in soft agar. Related to Figure 1J.

(H-K) PHMLEB cells stably expressing G6PD, 6PGD, TKT, and TALDO1 (TAL) as indicated were assayed for protein expression (H), adherent proliferation (I), and soft agar colony formation with quantification of colony numbers (J) and representative images of soft agar colonies (K).

(L and M) Control (Ctrl) PHMLEB cells and PHMLEB/G6PD cells expressing control shRNA (shCtrl) or shRNA against TKT (shTKT) or TALDO1 (shTAL) were assayed for soft agar colony formation (L and M). The expression of G6PD, TKT and TALDO1 proteins is shown in Figure 3L.

Data are means  $\pm$  SD of representative result (n = 3). \* $P$  < 0.05, \*\* $P$  < 0.01, \*\*\* $P$  < 0.001.

Figure S2

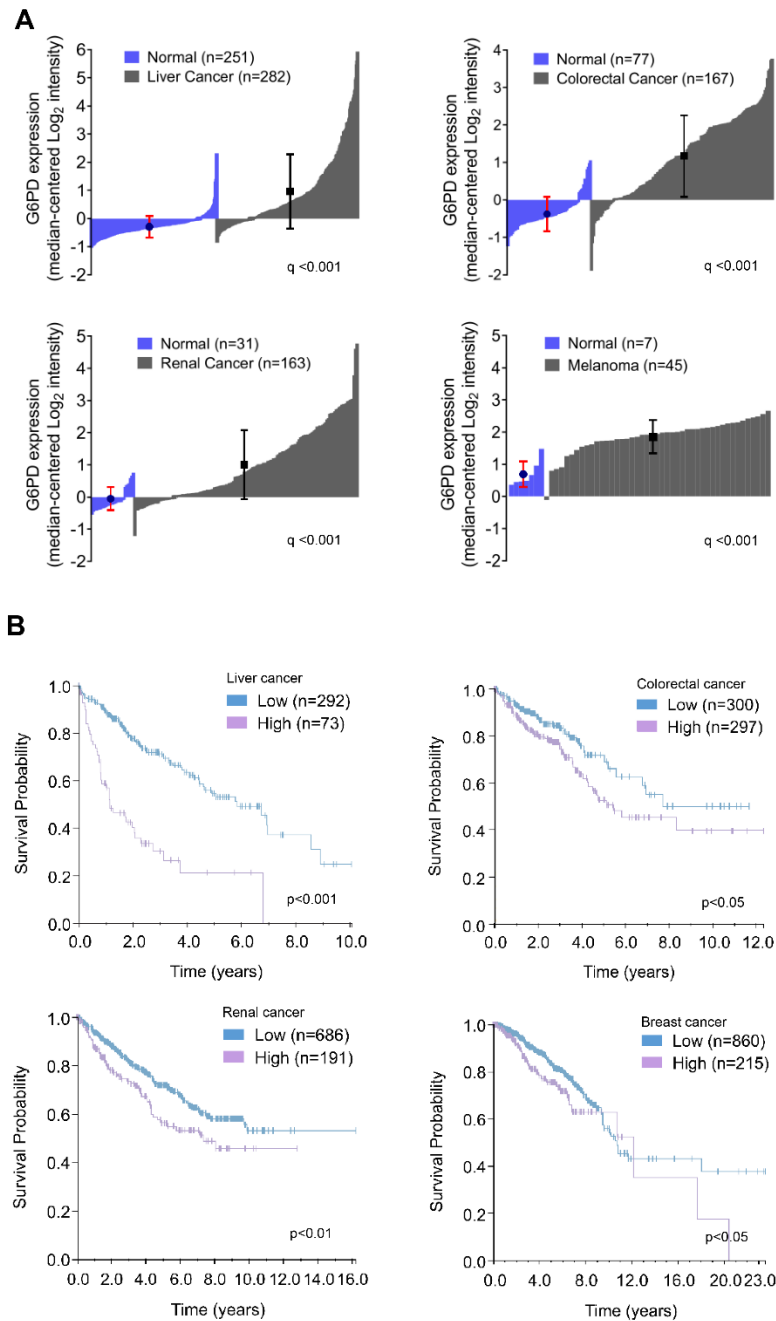

**Figure S2. G6PD is upregulated in human cancers correlating with poor survival, related to Figures 1 and 2**

(A) G6PD mRNA expression levels in patients of liver, colorectal, renal, and skin cancers, as well as corresponding normal controls (Oncomine database). The number of subjects included in each group and  $p$  value after Bonferroni correction are indicated.

(B) The survival curve of liver, colorectal, renal, and breast cancer patients with high and low G6PD expression (Human Protein Atlas database). The number of subjects included in each group and  $p$  value are indicated. Related to Table S1.

Figure S3

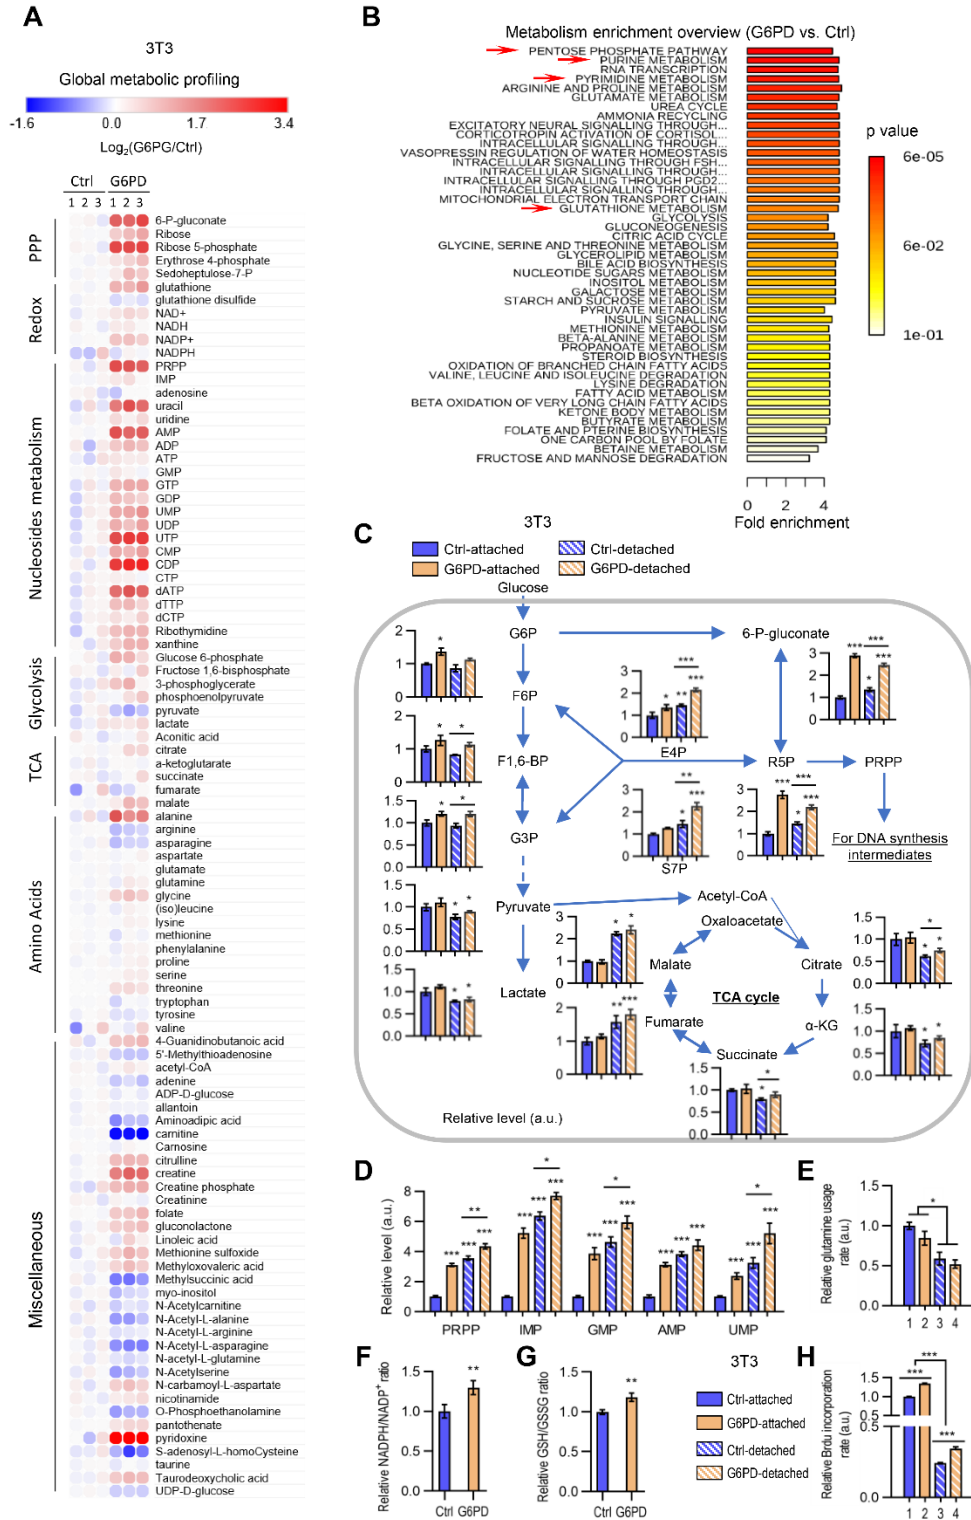

**Figure S3. G6PD overexpression reprograms glucose metabolism under matrix-attached and -detached conditions, related to Figure 3**

(A and B) Global metabolic profiles of control NIH3T3 and 3T3/G6PD cells grown on adherent plates were analyzed by LC-MS. The changes in metabolites are shown as heatmap (A) and major metabolic pathways enhanced by G6PD overexpression were identified by metabolism enrichment analysis (B).

(C-E, H) NIH3T3 and 3T3/G6PD cells cultured under matrix-attached or -detached conditions for 4 hr were assayed for central glucose metabolic metabolites (C) and nucleotide synthesis intermediates (D) by focused metabolic analysis, for glutamine usage (E), and for DNA synthesis by BrdU incorporation (H, normalized by cell number).

(F and G) Relative NADPH/NADP<sup>+</sup> (F) and GSH/GSSG (G) ratios in control NIH3T3 and 3T3/G6PD cells, based on the data in (A).

Data are means  $\pm$  SD of representative result (n = 3). \* $P$  < 0.05, \*\* $P$  < 0.01, \*\*\* $P$  < 0.001.

**Figure S4**

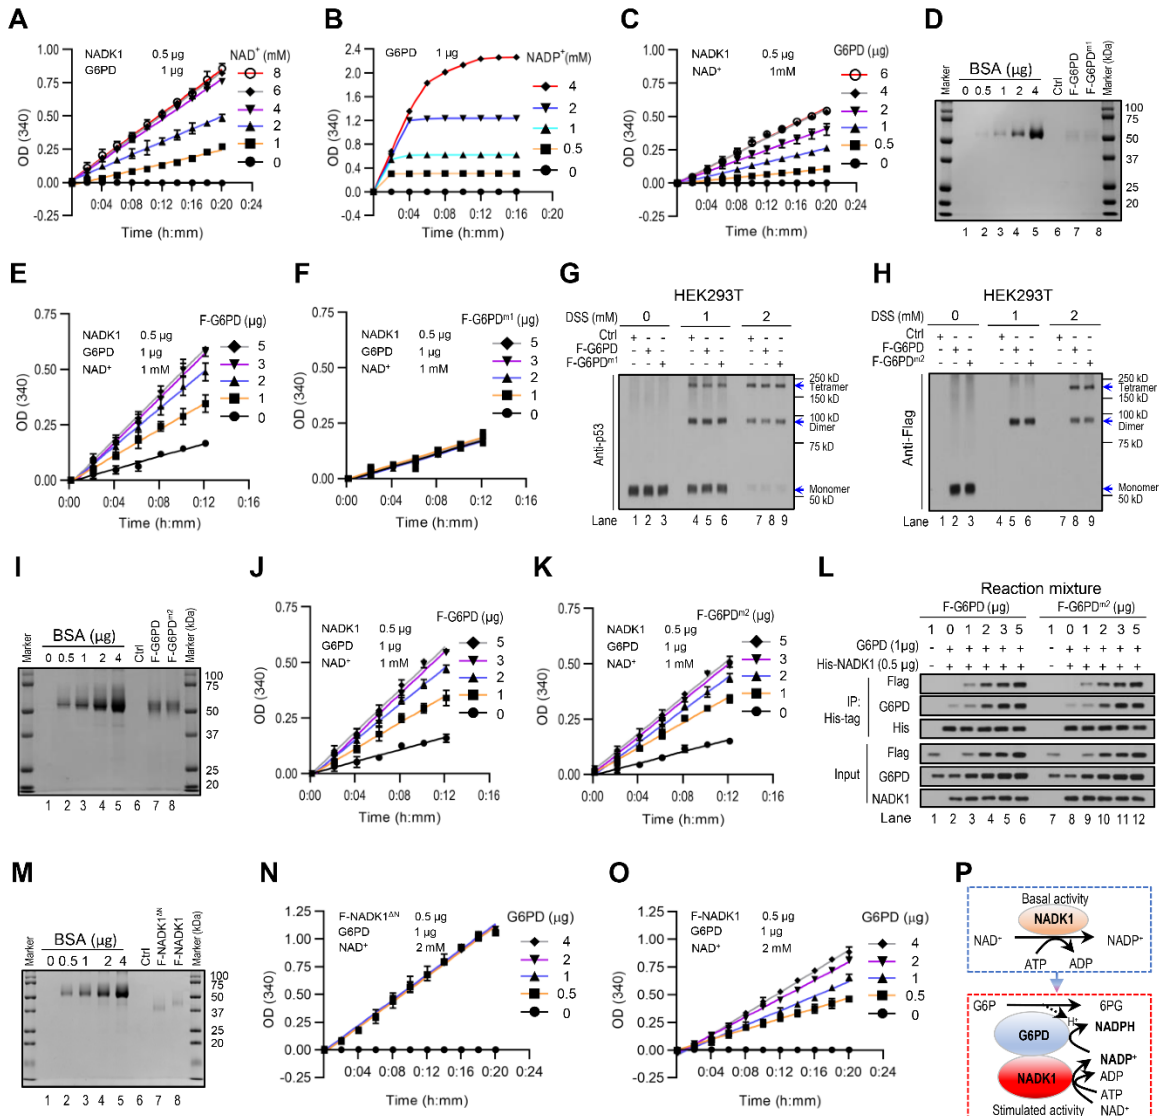

**Figure S4. G6PD associates with NADK1 and counteracts its autoinhibitory N-terminal region, increasing NADK1 enzymatic activity and driving the NAD<sup>+</sup>-NADP<sup>+</sup> flux, related to Figure 5**

(A) NAD<sup>+</sup> at varying concentrations was converted to NADP<sup>+</sup> by 0.5 μg of 6xHis-NADK1 then to NADPH by 1 μg of G6PD purified from *E. coli* (Sigma). Generation of NADPH was monitored by OD<sub>340</sub>. Related to Figure 5A.

(B) Conversion of different concentrations of NADP<sup>+</sup> to NADPH by 1 μg of G6PD was measured by OD<sub>340</sub>. Note that 1 μg G6PD can convert different moles of NADP<sup>+</sup> to NADPH rapidly (B). In contrast, when the same mole of NAD<sup>+</sup> was provided and catalyzed by 0.5 μg NADK1 to NADP<sup>+</sup> and then to NADPH by 1 μg G6PD, the rates of NADPH production were dramatically reduced



(A). This indicates that NADK1-mediated NADP<sup>+</sup> production from NAD<sup>+</sup> is the rate-limiting step of coupled reactions.

(C) 1 mM of NAD<sup>+</sup> was incubated with 0.5 μg of 6xHis-NADK1 and different amounts of G6PD purified from *E coli* (Sigma). Note that at the amount of 1 μg, G6PD could convert virtually all NADP<sup>+</sup> molecules at concentrations of 2 mM or less NADPH within 4 min as shown in (B). Thus, the rate of NADPH production in the reactions containing 1 μg or more G6PD over the course of 20 min was determined by NADK1-mediated conversion of NAD<sup>+</sup> to NADP<sup>+</sup>, rather than G6PD-mediated conversion of NADP<sup>+</sup> to NADPH. Related to Figure 5B.

(D) Coomassie blue staining of Flag-G6PD (F-G6PD) and Flag-G6PD<sup>m1</sup> (F-G6PD<sup>m1</sup>) proteins purified from HEK293T cells by anti-Flag mAb beads.

(E and F) Conversion of NAD<sup>+</sup> to NADPH measured by OD<sub>340</sub> in the presence of different amounts of Flag-G6PD (E) or Flag-G6PD<sup>m1</sup> (F) protein purified from HEK293T cells, 1 μg of G6PD purified from *E coli* (Sigma), 1 mM of NAD<sup>+</sup>, and 6xHis-NADK1 (0.5 mg). Related to Figure 5C.

(G and H) HEK293T cells transfected with control, Flag-G6PD, Flag-G6PD<sup>m1</sup>, or Flag-G6PD<sup>m2</sup> plasmid were treated with the indicated concentrations of DSS. Cell lysates were analyzed by Western blot for endogenous p53 (G) and Flag-tagged protein (H). p53 and G6PD/G6PD<sup>m2</sup> monomer, dimer, and tetramer are indicated. Endogenous p53 was used as a control for cross-linking. Note that same cross-linking conditions were used here and in Figure 5I.

(I) Coomassie blue staining of Flag-G6PD and Flag-G6PD<sup>m2</sup> proteins purified from HEK293T cells by anti-Flag mAb beads.

(J and K) Conversion of NAD<sup>+</sup> to NADPH measured by OD<sub>340</sub> in the presence of different amounts of Flag-G6PD (J) or Flag-G6PD<sup>m2</sup> (K) protein purified from HEK293T cells, 1 μg of G6PD purified from *E coli* (Sigma), 1 mM of NAD<sup>+</sup>, and 6xHis-NADK1 (0.5 mg). Related to Figure 5N.

(L) Interaction of 6xHis-NADK1 and F-G6PD or F-G6PD<sup>m2</sup> in the reaction mixtures in (J) and (K) was analyzed by a pull-down assay with nickel affinity gel.

(M) Coomassie blue staining for Flag-NADK1<sup>ΔN</sup> (F-NADK1<sup>ΔN</sup>) and Flag-NADK1 (F-NADK1) proteins purified from HEK293T cells by anti-Flag mAb beads.

(N and O) Conversion of NAD<sup>+</sup> to NADPH measured by OD<sub>340</sub> in the presence of different amounts of G6PD protein purified from *E coli* (Sigma), 2 mM of NAD<sup>+</sup>, and 0.5 μg of Flag-NADK1<sup>ΔN</sup> (N) or Flag-NADK1 (O) protein purified from HEK293T cells. Related to Figure 5R.

(P) A model shows that the activity of NADK1 alone (top) or when associated with G6PD (bottom). G6PD may stimulate NADK1 activity through binding with N-terminal region of NADK1, counteracting its autoinhibition on the kinase domain. The G6PD-NADK1 connection links the *de novo* production of NADP<sup>+</sup> to its conversion to NADPH.

Data are means ± SD of representative result (n = 3). \**P* < 0.05, \*\**P* < 0.01, \*\*\**P* < 0.001.

**Figure S5**

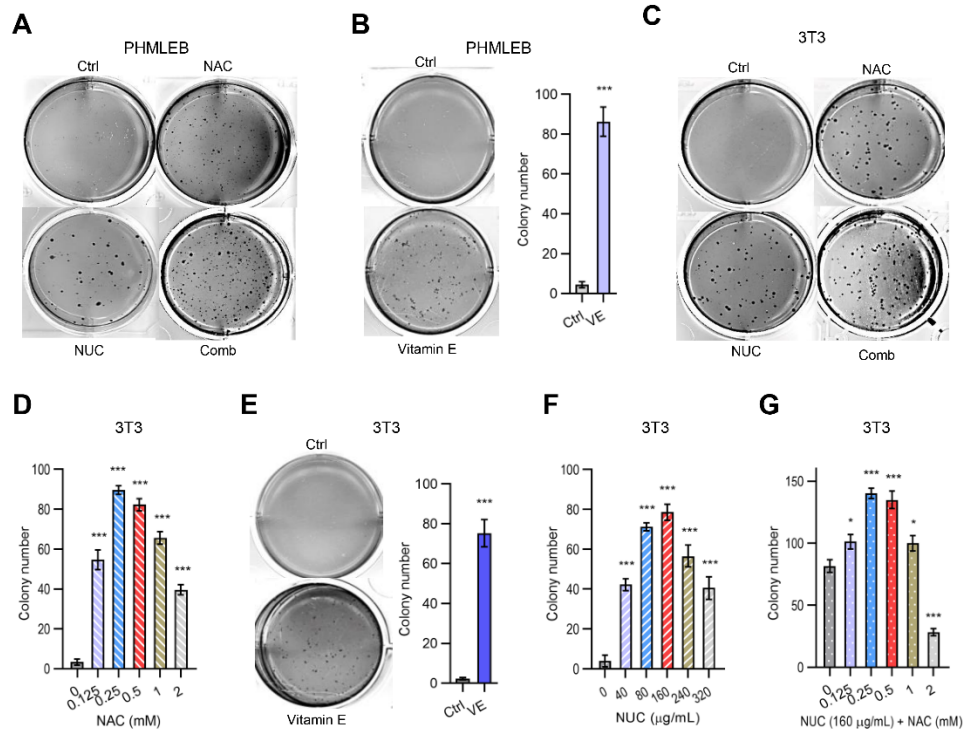

**Figure S5. Antioxidants and nucleosides confer on immortalized cells anchorage-independent growth, related to Figure 6**

(A, B, C, and E) Soft agar colony formation assay of PHMLEB (A and B) and NIH3T3 (C and E) cells in the presence of vehicle (Ctrl), NAC (0.25 mM), the Vitamin E (VE) derivative Trolox (0.5 mM), and/or nucleosides (NUC, 160  $\mu\text{g/mL}$ ) as indicated. Related to Figures 6A and 6B.

(D, F, and G) Quantification of soft agar colonies formed by NIH3T3 cells in the present different concentrations of NAC (D) or nucleosides (F), or different concentrations of NAC plus 160  $\mu\text{g/mL}$  of nucleosides (G). Related to Figure 6B.

Data are means  $\pm$  SD of representative result (n = 3). \* $P < 0.05$ , \*\*\* $P < 0.001$ .

Figure S6

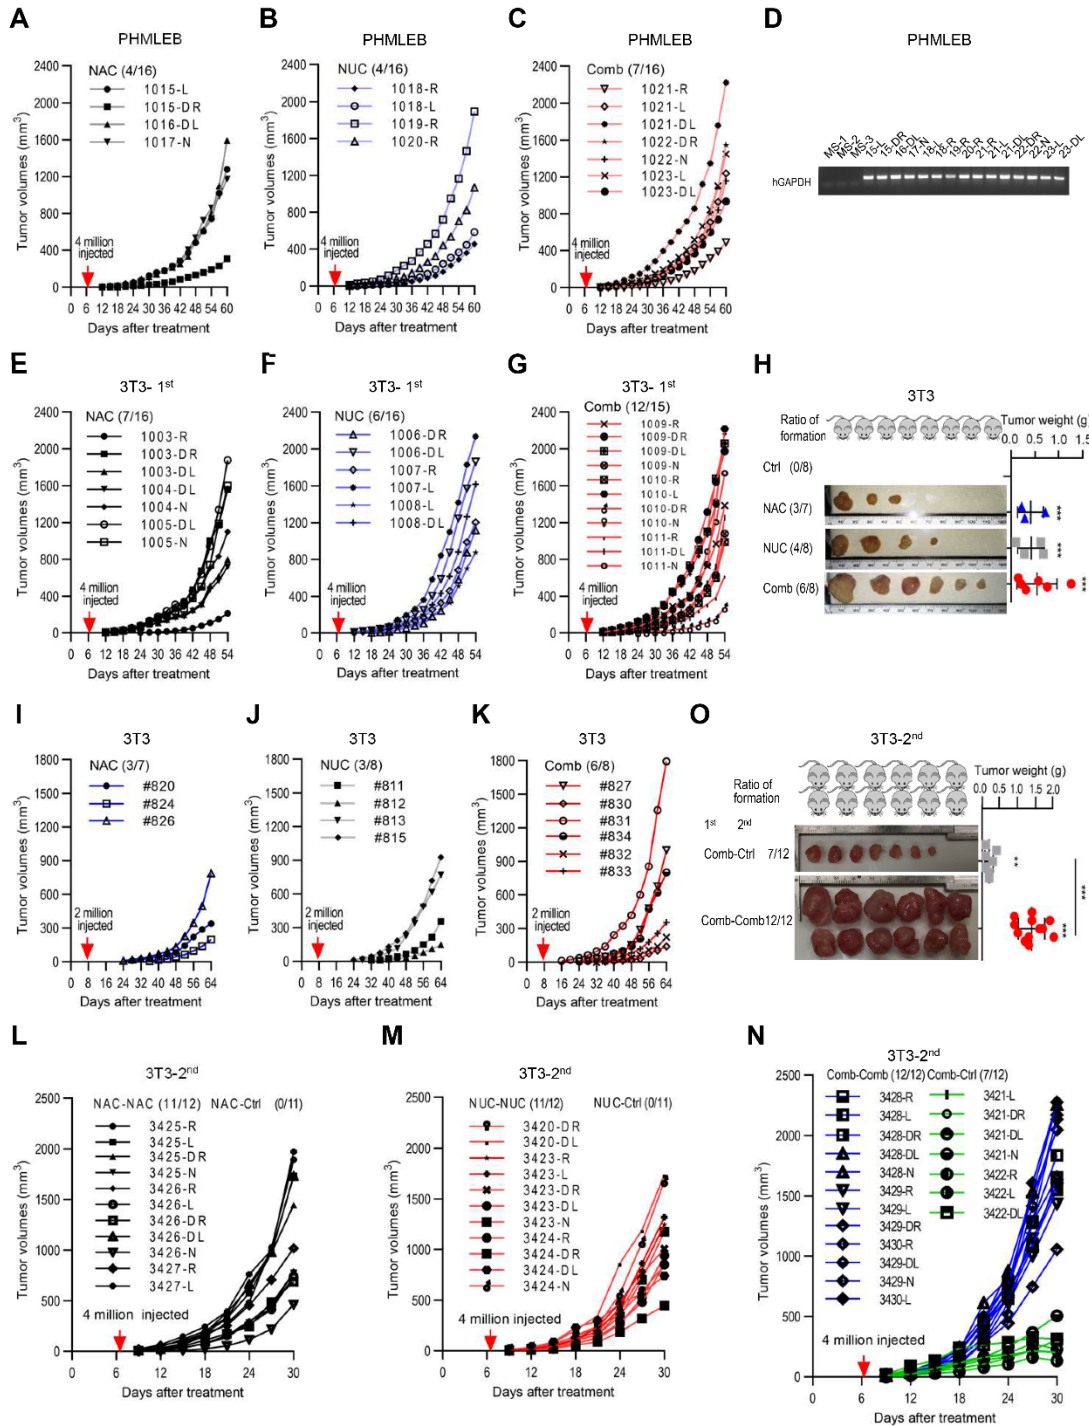

Figure S6. NAC and/or nucleosides permit tumor formation by PHMLEB cells and NIH3T3 cells in animals, and are still required for tumorigenicity when cells from initial tumors are re-inoculated in mice, related to Figure 6

(A-C) Four million of PHMLEB cells were subsequently injected into the flank of athymic nude mice supplemented with control, NAC, nucleosides (NUC), or both NAC and NUC (Comb). Shown are individual tumor growth curves (indicated as mice IDs) and the frequency of tumor formation for NAC (A), nucleosides (B), or both (C).

(D) RT-PCR analysis of human GAPDH gene (D) for tumors from (A), (B), and (C). Three mouse tissues (samples, MS1-3) were used negative controls.

(E-G and I-K) Four (E-G) or two (I-K) millions of NIH3T3 cells were injected into the flank of athymic nude mice treated with vehicle control, NAC, nucleosides, or both NAC and nucleosides (Comb) for tumor formation. Individual tumor growth curves and the frequency of tumor formation for NAC (E and I), nucleosides (F and J), or both (G and K) are shown.

(H) The frequency of tumor formation (left) and tumor images (middle) and weights (right) at the end of experiment are shown for the experiments in (I) to (K).

(L-N) Three representative tumors from each group (except control) in Figure 6D were dissected and digested with collagenase to generate single cells as described in the method. Four million of viable tumor cells were subsequently injected into the flank of new athymic nude mice for a secondary inoculation. Mice were treated with vehicle (Ctrl) or the same reagent(s) that permitted the initial tumor formation. Shown are individual tumor growth curves and the frequency of tumor formation for supplementation with NAC (L), nucleosides (M), and both NAC and nucleosides (N), as well as the corresponding controls.

(O) The frequency of tumor formation (left) and tumor images (middle) and weights (right) at the end of the experiment for (N).

Individual data and means  $\pm$  SD are shown.  $**P < 0.01$ ,  $***P < 0.001$ .

**Figure S7**

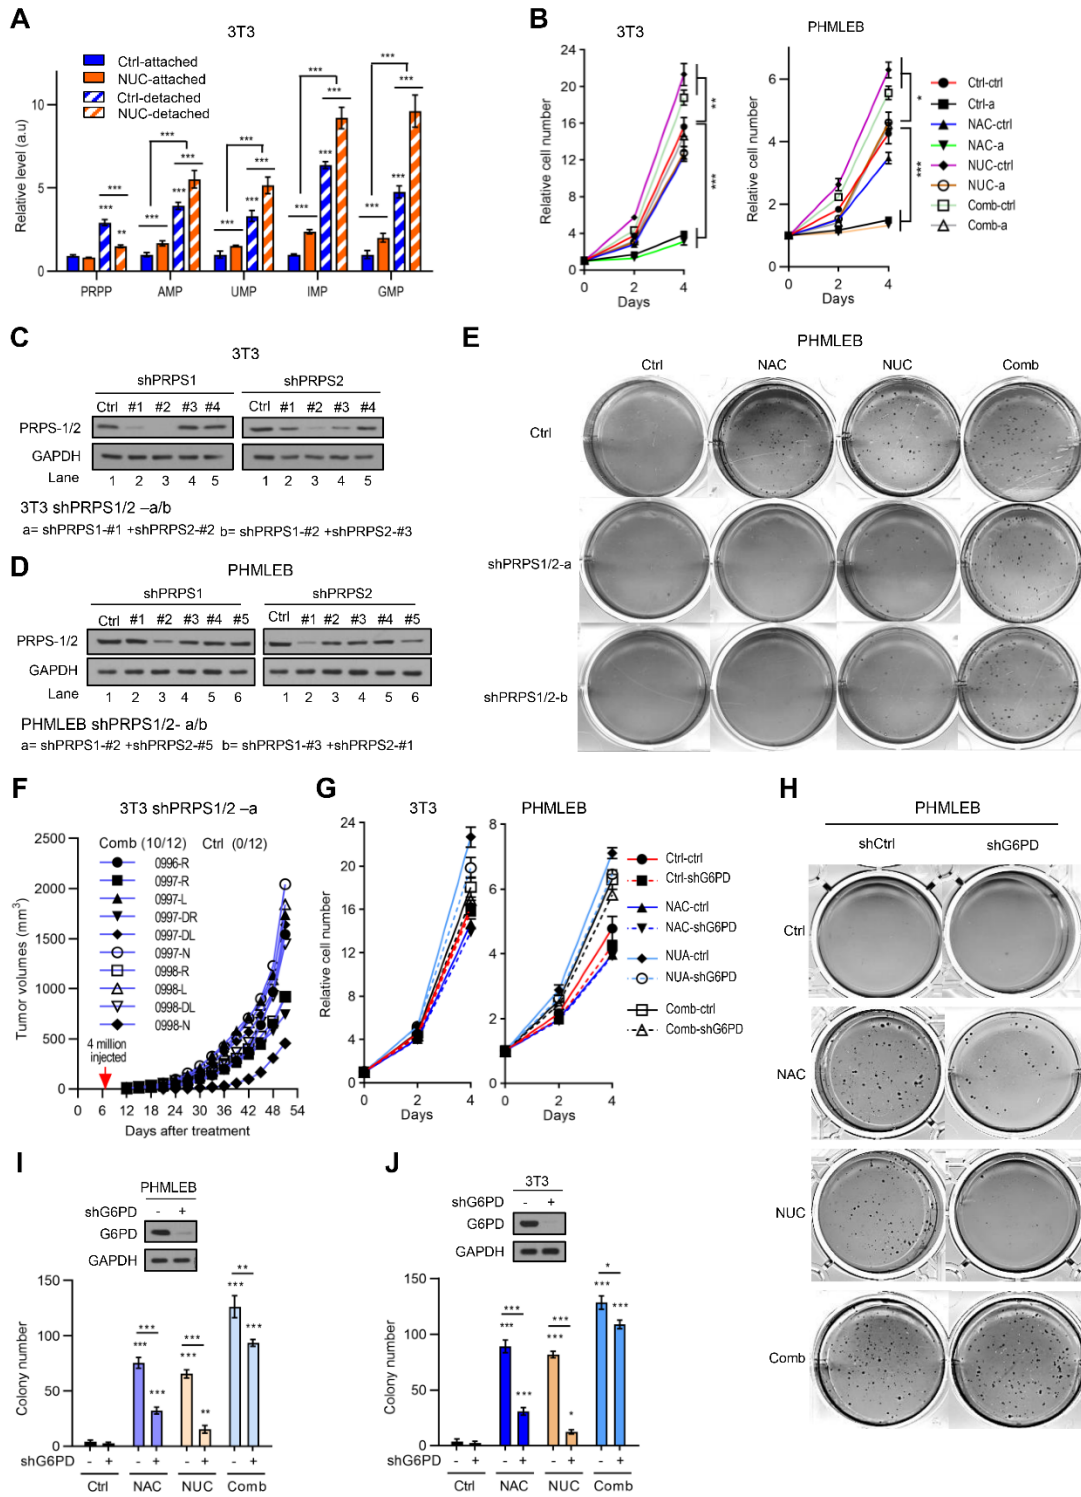

**Figure S7. Both NAC and nucleosides are required for transforming PRPS1/2- or G6PD-knockdown NIH3T3 and PHMLEB cells, related to Figure 7**

(A) Intermediates of nucleotide synthesis by focused metabolic analysis for NIH3T3 cells treated with vehicle or nucleosides (160  $\mu\text{g}/\text{mL}$ ) and cultured for 4 hr under matrix-attached and -detached conditions.

(B) Control and PRPS1/2-knockdown (via combination “a” of PRPS1/2 shRNAs) NIH3T3 and PHMLEB cells were treated with vehicle, NAC (0.25 mM), nucleosides (160  $\mu\text{g}/\text{mL}$ ), or both NAC and nucleosides as indicated and assayed for adhere proliferation. The combination of PRPS1/2 shRNAs is shown in (C) and (D). The knockdown efficiency of PRPS1/2 is shown in Figures 7J and 7K.

(C and D) Screening of shRNAs for PRPS1/2 knockdown in NIH3T3 (C) and PHMLEB (D) cells. Different shRNA combinations were used to generate two populations (“a” and “b”) of NIH3T3 and PHMLEB stable knockdown cells.

(E) Control and two different populations of PRPS1/2-knockdown PHMLEB cells were assayed for soft agar colony formation in the presence of vehicle (Ctrl), NAC (0.25 mM), nucleosides (160  $\mu\text{g}/\text{mL}$ ), or both NAC (0.25 mM) and nucleosides. Related to Figures 7K.

(F) Four million PRPS1/2-knockdown NIH3T3 cells were injected into the flank of athymic nude mice. Mice were treated with vehicle control, or NAC and nucleoside in combination, for tumor formation. Shown are the frequency of tumor formation and individual tumor growth curves for the combined treatment.

(G-J) PHMLEB (G-I) and NIH3T3 (G and J) cells with or without G6PD knockdown were treated with NAC (0.25 mM), nucleosides (160  $\mu\text{g}/\text{mL}$ ), or both, and assayed for adherent proliferation (G), and soft agar colony formation (H-J).

Data are means  $\pm$  SD (n = 3). \* $P < 0.05$ , \*\* $P < 0.01$ , \*\*\* $P < 0.001$ .

**Table S1. Statistical information of G6PD expression status and cancer patient survival, related to Figures 1, 2, and S2B**

|                                  | <b>Liver Cancer</b> | <b>Colorectal Cancer</b> | <b>Renal Cancer</b> | <b>Breast Cancer</b> |
|----------------------------------|---------------------|--------------------------|---------------------|----------------------|
| Expression cut off (FPKM)        | 15.7                | 15.0                     | 17.6                | 25.6                 |
| 5 years survival rate- G6PD high | 21%                 | 53%                      | 56%                 | 75%                  |
| 5 years survival rate- G6PD low  | 53%                 | 69%                      | 72%                 | 83%                  |
| P value                          | 9.45e-13            | 1.13e-2                  | 2.89e-3             | 1.73e-2              |
